# Supplementary material for: The FGFR1 Signaling Pathway Upregulates the Oncogenic Transcription Factor FOXQ1 to Promote Breast Cancer Cell Growth
Source: PubMed Central journal article supplement (PMC9909991; doi:10.7150/ijbs.74574), 2023-01-01
Supplement: ijbsv19p0744s1.pdf [file ijbsv19p0744s1.pdf]

## Supplementary Materials

**Table S1. siRNA sequences**

| siRNA     | Sequence               |                       |
|-----------|------------------------|-----------------------|
|           | Sense (5'-3')          | antisense (5'-3')     |
| siFOXQ1-1 | CCAUCAAAACGUGCCUAAAATT | UUUAAGGCACGUUGAUGGTT  |
| siFOXQ1-2 | CGCGGACUUUGCACUUUGATT  | UCAAAGUGCAAAGUCCGCGTT |
| siNC      | UUCUCCGAACGUGUCACGUTT  | ACGUGACACGUUCGGAGAATT |

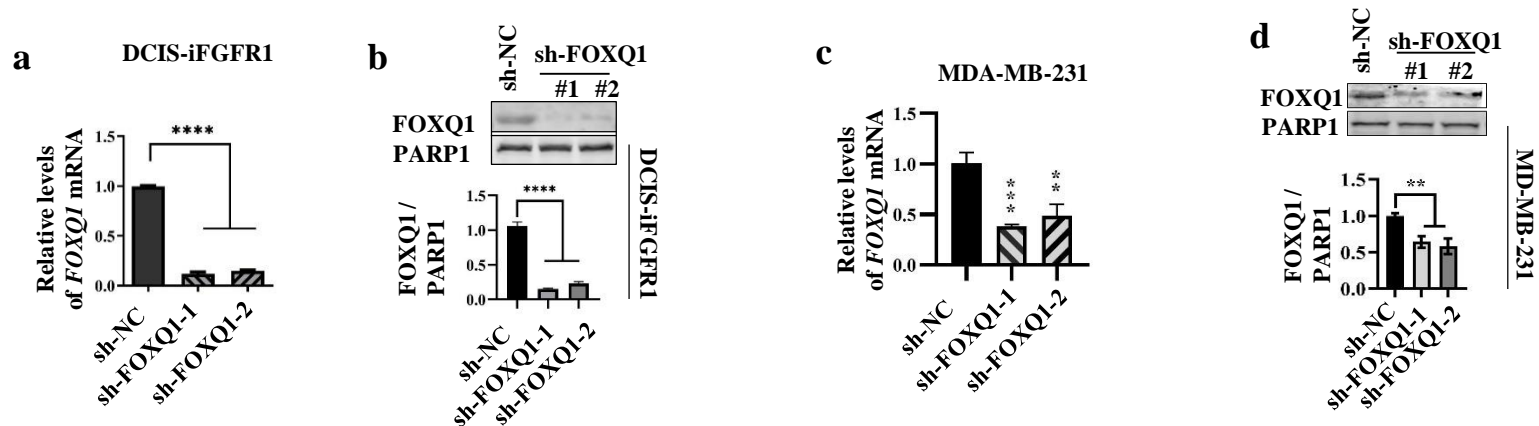

**Fig. S1. Generation of FOXQ1 knockdown DCIS-iFGFR1 and MDA-MB-231 cells.** **a** and **b**. RT-qPCR and Western blot (WB) assays of FOXQ1 mRNA and protein in sh-NC control, sh-FOXQ1-1, and sh-FOXQ1-2 expressing DCIS-iFGFR1 cell lines. **c** and **d**. RT-qPCR and WB assays of FOXQ1 mRNA and protein in sh-NC control, sh-FOXQ1-1, and sh-FOXQ1-2 expressing MDA-MB-231 cell lines. In all panels, quantitative data were obtained from 3 independent assays. The relative expression levels of FOXQ1 mRNA and protein were normalized to  $\beta$ -actin mRNA and PARP1 protein, respectively. \*\*, \*\*\*, and \*\*\*\*,  $p < 0.01$ ,  $0.001$ , and  $0.0001$ , respectively by One-Way ANOVA test.

**Table S2. Transcription factors predicted to bind to the FOXQ1 promoter by the PROMO database**

| Name            | Matrix   | Width | Name           | Matrix   | Width | Name           | Matrix   | Width |
|-----------------|----------|-------|----------------|----------|-------|----------------|----------|-------|
| GR- $\alpha$    | [T00337] | 5     | EBF            | [T05427] | 11    | GATA-1         | [T00306] | 6     |
| C/EBP $\beta$   | [T00581] | 4     | AP-1           | [T00029] | 9     | VDR            | [T00885] | 9     |
| Pax-5           | [T00070] | 7     | c-Jun          | [T00133] | 7     | PXR-1          | [T05671] | 8     |
| p53             | [T00671] | 7     | c-Fos          | [T00123] | 10    | GR             | [T05076] | 7     |
| GR- $\beta$     | [T01920] | 5     | T3R- $\beta$ 1 | [T00851] | 9     | TFIID          | [T00820] | 7     |
| NF-kappaB1      | [T00593] | 11    | IRF-2          | [T01491] | 6     | Sp1            | [T00759] | 10    |
| IRF-1           | [T00423] | 9     | PPAR- $\alpha$ | [T05221] | 11    | C/EBP $\alpha$ | [T00105] | 7     |
| ENKTF-1         | [T00255] | 8     | ETF            | [T00270] | 11    | HNF-3 $\alpha$ | [T02512] | 8     |
| TFII-I          | [T00824] | 6     | RAR- $\beta$   | [T00721] | 10    | NFI/CTF        | [T00094] | 8     |
| STAT4           | [T01577] | 6     | E2F-1          | [T01542] | 8     | GCF            | [T00320] | 9     |
| c-Ets-1         | [T00112] | 7     | WT1            | [T00899] | 9     | MAZ            | [T00490] | 13    |
| NF-1            | [T00539] | 8     | Egr-1          | [T00241] | 16    | HOXD9          | [T01424] | 10    |
| AP-2 $\alpha$ A | [T00035] | 6     | Sp3            | [T02338] | 16    | HOXD10         | [T01425] | 10    |
| YY1             | [T00915] | 4     | Elk-1          | [T00250] | 9     | SRY            | [T00997] | 9     |
| RXR- $\alpha$   | [T01345] | 7     | uSF2           | [T00878] | 10    | TCF-4E         | [T02878] | 7     |
| FOXP3           | [T04280] | 6     | LEF-1          | [T02905] | 8     | c-Ets-2        | [T00113] | 9     |
| PR B            | [T00696] | 7     | ER- $\alpha$   | [T00261] | 5     | XBP-1          | [T00902] | 6     |
| PR A            | [T01661] | 7     | TCF-4          | [T02918] | 10    | AR             | [T00040] | 9     |
|                 |          |       |                |          |       | NF-Y           | [T00150] | 8     |

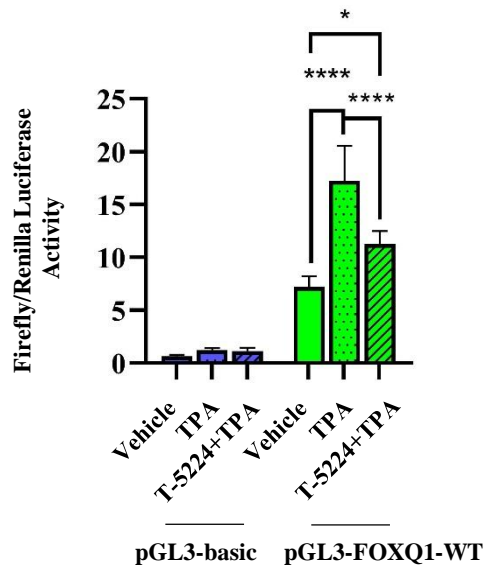

**Fig. S2. c-FOS strongly increases the the transcriptional activity of the FOXQ1 promoter.** HEK293 cells were transfected with pGL3-basic vector or FOXQ1-WT reporter with a firefly luciferase sequence. Another Renilla luciferase-expressing vector was co-transfected as a normalizer. Transfected cells were treated with vehicle, TPA, or TPA and T-5224 as indicated. The relative activities of the pGL3-basic control and the FOXQ1-WT firefly luciferase reporters were presented after normalized to the Renilla luciferase activity. \* and \*\*\*\*,  $p < 0.05$  and  $0.0001$ , respectively by the One-Way ANOVA test.
